# Supplementary material for: Maternal gestational diabetes mellitus modulates adipose tissue remodeling and CTRP6 expression in a depot- and sex-specific manner in mouse offspring
Source: Research Square preprint supplement (doi:10.21203/rs.3.rs-8114097/v1), 2025-11-21
Supplement: Supplementary file 1 [file 2fa4e65440f9c8394ae66455.xlsx]

## Sheet: Sheet1
	1B	Body fat ratio	PND21																week 9									week 9									week 9
																			Male				Female					Male				Female					Male				Female
			BAT*100/BW	NGT (MALE)	GDM (MALE)	NGT (FEMALE)	GDM (FEMALE)	sWAT*100/BW	NGT (MALE)	GDM (MALE)	NGT (FEMALE)	GDM (FEMALE)	vWAT*100/BW	NGT (MALE)	GDM (MALE)	NGT (FEMALE)	GDM (FEMALE)	BAT*100/BW	NGT-CHOW	NGT-HFD	GDM-CHOW	GDM-HFD	NGT-CHOW	NGT-HFD	GDM-CHOW	GDM-HFD	sWAT*100/BW	NGT-CHOW	NGT-HFD	GDM-CHOW	GDM-HFD	NGT-CHOW	NGT-HFD	GDM-CHOW	GDM-HFD	vWAT*100/BW	NGT-CHOW	NGT-HFD	GDM-CHOW	GDM-HFD	NGT-CHOW	NGT-HFD	GDM-CHOW	GDM-HFD
		mice 1		0.383265	0.885542	0.346923	1.04691		0.0238776	2.05145	0.0755769	1.98704			0.401325		0.432346		0.210711	0.125	0.24592	0.208719	0.258756	0.176995	0.214029	0.208786				0.72116	0.712562	0.644428		0.36466			0.713874	1.06322	0.71356	1.48174	0.756219		0.314369
		mice 2		0.659722	0.882	0.46078	0.8227		0.894444	1.80133	0.0807	2.8684			0.505714		0.1678		0.117878	0.153232	0.0860777	0.12742	0.183218	0.208134	0.20229	0.165075			0.853064	0.562261	0.732568	0.608812	0.877416	0.459533			0.634122		1.12742	1.5493		1.06574	0.621636
		mice 3		0.714776	1.11988	0.4695			0.356269	1.50917	0.867	1.8547			0.429048		0.128795		0.1208	0.181172	0.108352	0.1364	0.175951	0.37395		0.203128		0.50464	0.705586	0.364176		0.562195		0.66105	0.830359		0.46092		0.914505	1.26773	0.895024		0.6406	0.955128
		mice 4		0.789091	0.712091	0.767333	0.700734		0.160182	2.14218	0.759333	3.0455			0.288		0.282844		0.116039	0.203244	0.168091	0.304708	0.200486	0.347415	0.3414	0.175728		0.485725	0.869542	0.493273	0.760117	0.520054	1.656	0.256	1.15646		0.456078	1.2587	0.625818	1.9416	0.454919	1.47624	0.64235	0.883447
		mice 5		0.589	0.9638	0.5854	1.1375		0.49	1.5989	1.0677	1.38842			0.3355	0.5911	0.0188158		0.137555	0.229414	0.2035	0.310372	0.267033	0.285594	0.24255	0.252646		0.458175	0.97332	0.621458	0.724907	0.603187	1.35094	0.4562	0.770423			2.26812	1.66288		0.632088	1.11292		0.854339
		mice 6		0.7162	1.13259	0.685	1.06446		0.3023	2.91859	1.24273	1.8794		0.1195	0.727481	0.287386	0.196627		0.100485	0.196579		0.289024	0.127091	0.132415		0.273568		0.350784	1.00786		0.680285	0.769864	1.73326	0.492956	1.26503		0.47959	2.50368		1.63825	0.767955	1.84763	0.584335	1.61085
		mice 7		1.01191	1.12062	0.723182	1.15901		0.567941	1.94794	1.29773	2.58747			0.518763	0.348523	0.226813		0.190623	0.192747			0.225105	0.189249	0.179211	0.375585		0.34663	0.717768			0.647105			0.949415		0.500403	1.21425			0.790579	0.985962	0.861263	1.07755
		mice 8		0.896034	0.570206	0.676907	0.831443		0.371207	1.77835	0.827526	1.87639		0.528793	0.44268	0.226598	0.269691		0.3176	0.12			0.142279	0.312113	0.182678	0.259307		0.37976	1.08128			0.50707		0.508087	1.23842			1.57535			0.485535		0.425355	1.06634
		mice 9		0.5892		0.816774	0.881442		0.3152		0.910484	2.29087				0.0512903	0.684423		0.135862	0.26588			0.118593	0.236516		0.301934		0.439004	0.91856			0.618141	1.2767		1.6434		0.437088	1.95064			0.620653			1.86104
		mice 10		0.7859			1.05846		0.7299			2.75055		0.3841			0.484505		0.171202	0.2492			0.158585					0.350543	0.79588			0.542877					0.512171	1.4206			0.502217
		mice 11																	0.17556									0.377054									0.681328
	1C	Body weight	PND21				week 9
							Male				Female
			NGT (MALE)	GDM (MALE)	NGT (FEMALE)	GDM (FEMALE)	NGT-CHOW	NGT-HFD	GDM-CHOW	GDM-HFD	NGT-CHOW	NGT-HFD	GDM-CHOW	GDM-HFD
		mice 1	4.9	8.3	5.2	8.1	25.3	27	25	24.2	20.1	19.3	20.6	20.6
		mice 2	7.2	10.5	5	10	24.5	29.7	28.3	25.7	20.2	20.9	21.4	20.1
		mice 3	6.7	8.4	6	8.3	25	29	27.3	26	20.5	11.9	20	19.5
		mice 4	5.5	11	6	10.9	25.5	26.2	22	25.7	18.5	20.5	20	20.6
		mice 5	6	10	10	7.6	27.4	25.6	24	26.9	18.2	20.2	20	18.9
		mice 6	10	13.5	8.8	8.3	26.8	26.6		24.6	22	23.6	20.3	19.9
		mice 7	6.8	9.7	8.8	9.1	27.3	23.3			19	21.3	19	18.8
		mice 8	5.8	9.7	9.7	9.7	25	22.6			21.5	19.4	18.3	20.2
		mice 9	10		6.2	10.4	26.1	25			19.9	22.1		21.2
		mice 10	10			9.1	25.8	25			21.2
		mice 11					24.1
	1D	weight of BAT	PND21				week 9
							Male				Female
			NGT (MALE)	GDM (MALE)	NGT (FEMALE)	GDM (FEMALE)	NGT-CHOW	NGT-HFD	GDM-CHOW	GDM-HFD	NGT-CHOW	NGT-HFD	GDM-CHOW	GDM-HFD
		mice 1	0.01878	0.0735	0.01804	0.0848	0.05331	0.03375	0.06148	0.05051	0.05201	0.03416	0.04409	0.04301
		mice 2	0.0475	0.09261	0.023039	0.08227	0.02888	0.04551	0.02436		0.03701	0.0435	0.04329	0.03318
		mice 3	0.04789	0.09407	0.02817		0.0302	0.05254	0.02958	0.035464	0.03607	0.0445		0.03961
		mice 4	0.0434	0.07833	0.04604	0.07638	0.02959	0.05325	0.03698	0.07831	0.03709	0.07122	0.06828	0.0362
		mice 5	0.03534	0.09638	0.05854	0.08645	0.03769	0.05873	0.04884	0.08349	0.0486	0.05769	0.04851	0.04775
		mice 6	0.07162	0.1529	0.06028	0.08835	0.02693	0.05229		0.0711	0.02796	0.03125	0.38802	0.05444
		mice 7	0.06881	0.1087	0.06364	0.10547	0.05204	0.04491			0.04277	0.04031	0.03405	0.07061
		mice 8	0.05197	0.05531	0.06566	0.08065	0.0794	0.02712			0.03059	0.06055	0.03343	0.05238
		mice 9	0.05892		0.05064	0.09167	0.03546	0.06647			0.0236	0.05227		0.06401
		mice 10	0.07859		0.03905	0.09632	0.04417	0.0623			0.03362
		mice 11					0.04231
	1E	weight of sWAT	PND21				week 9
							Male				Female
			NGT (MALE)	GDM (MALE)	NGT (FEMALE)	GDM (FEMALE)	NGT-CHOW	NGT-HFD	GDM-CHOW	GDM-HFD	NGT-CHOW	NGT-HFD	GDM-CHOW	GDM-HFD
		mice 1	0.01195	0.03331	0.05911	0.03502	0.22051	0.06801	0.18029	0.17244	0.12953	0.08647	0.07512	0.09501
		mice 2	0.03067	0.0531	0.02529	0.01678	0.20304	0.25336	0.15912	0.18827	0.12298	0.18338	0.09834	0.09952
		mice 3	0.03841	0.03604	0.03067	0.01069	0.12616	0.20462	0.09942	0.47271	0.11525	0.05275	0.13221	0.16192
		mice 4	0.07082	0.03168	0.02198	0.03083	0.12386	0.22782	0.10852	0.19535	0.09621	0.33948	0.0512	0.23823
		mice 5		0.03355	0.00318	0.00143	0.12554	0.24917	0.14915	0.195	0.10978	0.27289	0.09124	0.14561
		mice 6		0.09821	0.00656	0.01632	0.09401	0.26809		0.16735	0.16937	0.40905	0.10007	0.25174
		mice 7		0.05032		0.02064	0.09463	0.16724			0.12295	0.09813	0.09298	0.17849
		mice 8		0.04294		0.02616	0.09494	0.24437			0.10902	0.28215		0.25016
		mice 9				0.07118	0.11458	0.22964			0.12301			0.3484
		mice 10				0.04409	0.09044	0.19897			0.11509
		mice 11					0.09087
	1F	weight of vWAT	PND21				week 9
							Male				Female
			NGT (MALE)	GDM (MALE)	NGT (FEMALE)	GDM (FEMALE)	NGT-CHOW	NGT-HFD	GDM-CHOW	GDM-HFD	NGT-CHOW	NGT-HFD	GDM-CHOW	GDM-HFD
		mice 1	0.00117	0.17027	0.00393	0.16095	0.18061	0.28707	0.17839	0.35858	0.152	0.09636	0.06476	0.18625
		mice 2	0.0644	0.18914	0.004035	0.28684	0.15536	0.28498	0.31906	0.39817	0.25301	0.22274	0.13303	0.18199
		mice 3	0.02387	0.12677	0.05202	0.15394	0.11523	0.21131	0.24966	0.32961	0.18348	0.2943	0.12812	0.16147
		mice 4	0.00881	0.23564	0.04556	0.33196	0.1163	0.32978	0.13768	0.49899	0.08416	0.30263	0.12847	0.32056
		mice 5	0.0294	0.15989	0.10677	0.10552	0.2478	0.58064	0.39909	0.18631	0.11504	0.22481	0.9435	0.20258
		mice 6	0.03023	0.39401	0.10936	0.15599	0.12853	0.66598		0.40301	0.16895	0.43604	0.11862	0.2154
		mice 7	0.03862	0.18895	0.1142	0.23546	0.13661	0.28292			0.15021	0.21001	0.16364	0.39454
		mice 8	0.02153	0.1725	0.08027	0.18201	0.31465	0.35603			0.10439	0.11301	0.07784
		mice 9	0.03152		0.05645	0.23825	0.11408	0.48766			0.12351
		mice 10	0.07299		0.05754	0.2503	0.13214	0.35515			0.10647
		mice 11					0.1642
	1G		PND21 GTT								AUCGTT
				0	15	30	60	90	120			NGT (MALE)	GDM (MALE)	NGT (FEMALE)	GDM (FEMALE)
		NGT (MALE)	mice 1	4.9	7.1	7.8	6.3	9.7	7.3		mice 1	908.25	1448.25	774	1862.25
			mice 2	4.6	10.1	6.2	6	7.1	5.7		mice 2	804	1298.25	580.5	1202.25
			mice 3	8.4	8.7	5.9	5.7	5.9	4.7		mice 3	744.75	1645.5	749.25	1301.25
			mice 4	3.7	14.2	9.9	8.8	7.1	5.9		mice 4	1029	1665.75	1105.5
			mice 5	5.9	12.9	6.3	7.7	7.6	5.9		mice 5	927	2326.5	1010.25
			mice 6	4.7	21	10.8	7	5	3.2		mice 6	1001.25		446.25
			mice 7	3.1	18.9	14.3	5.4	3.8	6		mice 7	994.5
			mice 8	4.1	18.5	4.7	6.1	5.7	4.3		mice 8	832.5
			mice 9	5.6	21.1	13.8	8.1	8.8	6.2		mice 9	1269
		GDM (MALE)	mice 1	10.1	23.1	16.4	9.1	8.6	8.4
			mice 2	8.7	21.7	13.2	10.5	6.8	6.1
			mice 3	9.6	26.8	16.2	8.8	11.8	12.6
			mice 4	9.8	28.9	17.1	11.7	9.8	8.6
			mice 5	10.4	28.2	28.8	24.4	10.5	8.7
		NGT (FEMALE)	mice 1	3.2	18.3	7.6	3.4	5.3	2.9
			mice 2	3.4	17.3	4.6	4.9	1.5
			mice 3	2.8	15.1	8.9	4.4	4.1	3.1
			mice 4	9.9	13.9	8.3	8.3	9.7	6.4
			mice 5	6.2	18.2	12.9	4.9	5.1	6.7
			mice 6	4.6	8.6	4.7	3.4	2.5
		GDM (FEMALE)	mice 1	10.6	26.6	25.3	15.9	7.8	6.9
			mice 2	11.4	21.2	10.7	8.1	6.8	7.4
			mice 3	8.1	15.8	12.8	9.3	11.1	6.9
	1H		PND21 ITT								AUCITT
				0	15	30	60	90	120			NGT (MALE)	GDM (MALE)	NGT (FEMALE)	GDM (FEMALE)
		NGT (MALE)	mice 1	5.8	3.6	2.9	2.7	2.9	3.7		mice 1	252.75	589.5	261	819.75
			mice 2	3.3							mice 2		689.25	214.5	769.5
			mice 3	2.3							mice 3		354	215.5	469.5
		GDM (MALE)	mice 1	13.3	9.5	4.7	5.4	8.8	8.5		mice 4		672		440.25
			mice 2	13.8	11.5	6.2	7.8	10.1	6.9		mice 5				585
			mice 3	11.7	6	3.9	2.8	2.9	4.3
			mice 4	12.9	10.7	7.3	8.3	7.7	8.7
		NGT (FEMALE)	mice 1	4.7	3.4	3.6	2.9	3.8	2.7
			mice 2	5.9	2.4	2.8	2.3	2.4	2.9
			mice 3	4.9	2.7	1.4	1.4	2	2.3
		NGT (MALE)	mice 1	12.1	11.2	9.9	10.4	11.2	11.8
			mice 2	13.4	10.6	10.9	8.7	10.1	8.6
			mice 3	10.2	5.8	5.4	5.1	6.6	6.6
			mice 4	7	8.5	5.8	4.2	4.4	5.9
			mice 5	9.2	8	6.5	10.2	6.5	6.4
	1I		week 9 Male GTT							AUCGTT
				0	15	30	60	120			NGT-CHOW	NGT-HFD	GDM-CHOW	GDM-HFD
		NGT-CHOW	mice 1	7.9	17.9	19.7	13.9	9.8		mice 1	1227	1644	1290.75	1486.5
			mice 2	8.4	21.7	18.3	11.1	7.2		mice 2	1088.25	1314	1434	1543.5
			mice 3	6.8	26.4	21.3	10.1	7.1		mice 3	831.75	1022.25	1694.25	1518.75
			mice 4	6.7	20.4	14.6	11.1	5.3		mice 4	1170.75	1725.75	1610.25	1615.5
			mice 5	7.8	18.2	19.7	13.2	8.8		mice 5	1047.75	1503.75	1347.75	1386.75
		NGT-HFD	mice 1	6.8	25.1	25.4	12.1	10.3
			mice 2	6.2	20.2	20.6	14.2	8.6
			mice 3	6.9	18.1	21	14.7	9.8
			mice 4	5.6	17	18.4	12.3	7.9
			mice 5	5.7	20.4	22.9	16.9	9.8
		GDM-CHOW	mice 1	1.3
			mice 2	9	20.1	22.3	16.8	11.7
			mice 3	8.8	15.2	17.7	11.4	8.3
			mice 4	7.6	19.9	23.5	18	11.8
			mice 5	8.1	20.7	27.2	17.1	12.3
		GDM=HFD	mice 1	7.7	19.1	24.7	18.2	10
			mice 2	8.3	29	26.8	22.6	13.3
			mice 3	7.8	25.9	24.4	18.3	8.7
			mice 4	8.8	22.9	29.4	19.8	11.6
	1J		week 9 Male ITT							AUCITT
				0	15	30	60	120			NGT-CHOW	NGT-HFD	GDM-CHOW	GDM-HFD
		NGT-CHOW	mice 1	8	7.2	4.3	4.7	6.2		mice 1	662.25	621.75		1208.25
			mice 2	10.6	8.4	6.7	4.6	5.9		mice 2	740.25	663	772.5	1197.75
			mice 3	9.5	8.5	6	5.4	6.2		mice 3	762.75	689.25	675.75	1109.25
			mice 4	9.1	9.3	6.8	5.6	7.3		mice 4	831.75	819.75	776.25	1119.75
			mice 5	12.1	7.4	5.1	5.1	15.1		mice 5	999	750	687.75
		NGT-HFD	mice 1	8.9	5.6	6.2	3.5	5.8
			mice 2	11.2	10.7	6.6	3.4	3.9
			mice 3	12.6	9.1	6.7	4.3	3.8
			mice 4	14.2	10.7	8.7	4.2	5.6
			mice 5	10.9	9.6	7.1	5.5	3.9
		GDM-CHOW	mice 1
			mice 2	9.3	9.7	7.9	6.9	2.3
			mice 3	10.1	11.6	5.6	3.8	4.3
			mice 4	11.1	10.3	6.2	4.4	6.7
			mice 5	9.1	11	5	3.8	5.7
		GDM=HFD	mice 1	15.3	14.9	12	10.2	4.7
			mice 2	14.3	12.6	10.2	7.2	11.6
			mice 3	13.2	11.4	12.9	7.8	6.6
			mice 4	15.2	15.1	10.3	7.1	7.6
			mice 5	12	8.6	5.3
	1K		week 9 Female GTT							AUCGTT
				0	15	30	60	120			NGT-CHOW	NGT-HFD	GDM-CHOW	GDM-HFD
		NGT-CHOW	mice 1	6.7	15.3	12.5	9.8	7.5		mice 1	1690.5	1852.5	1977.75	2019
			mice 2	7.2	12.5	12.3	8.6	6.1		mice 2	1515.75	1710	2048.25	2516.25
			mice 3	6.2	9.6	6.3	6.5	6.9		mice 3	1593.75	1751.25	2121.75	2080.5
			mice 4	6	14.2	14.1	8.1	7.7		mice 4	1343.25	1918.5		2310
			mice 5	7.8	17.4	12.5	7.2	4.1		mice 5	1632.75
		NGT-HFD	mice 1	5.9	28.7	21.5	10.9	6.5
			mice 2	5.9	19.6	13.1	9.6	8.3
			mice 3	5.6	13.1	10.3	8.2	6.1
			mice 4	7.8	22.9	21.7	13.7	7.3
			mice 5	6.1	17.4	18.6	11.9	8.1
		GDM-CHOW	mice 1	5.3	20.2	16.2	9.5	5.2
			mice 2	5.3	17.7	21.1	11.4	4.7
			mice 3	5.1	20.1	18.8	16.9	5.7
			mice 4	8.8	19.8	15.3	13.8	9.4
			mice 5	7	23.1	16.9	7.7	7.4
		GDM=HFD	mice 1	6	28.2	19.4	10.4	3.8
			mice 2	8.9	14.6	22.7	12.4	6.3
			mice 3	7.2	24.3	16.9	11.6	6.6
			mice 4	7.7	15.2	15.9	16.2	8.1
			mice 5	6.8	16.7	17.9	11.5	5.5
	1L		week 9 Female ITT							AUCITT
				0	15	30	60	120			NGT-CHOW	NGT-HFD	GDM-CHOW	GDM-HFD
		NGT-CHOW	mice 1	6.5	5.4	4	4.5	5.8		mice 1	596.25	424.5	532.5	608.25
			mice 2	8.2	5.7	2.6	2.3	4.2		mice 2	435	420	569.25	847.5
			mice 3	9.9	8.1	5.6	2.3	3.4		mice 3	527.25	481.5	513	659.25
			mice 4	12.1	5.7	2.3	1.1	4.1		mice 4	400.5	489.75	504.75	559.5
			mice 5	6.5	4.1	2.3	3.2	4.3		mice 5	435	513	495	574.5
		NGT-HFD	mice 1	9.9	4.9	4.1	2.3	2.7
			mice 2	9.3	5.6	3.5	2.5	2.5
			mice 3	9.9	5.1	4.9	2.3	3.9
			mice 4	10.2	6.4	3.9	2.7	3.6
			mice 5	9.2	7.6	3.2	2.2	5.3
		GDM-CHOW	mice 1	8.6	7.4	2.8	2.6	5.9
			mice 2	8.4	5.1	3.7	3.5	6.3
			mice 3	12.3	5	4.7	1.6	5.6
			mice 4	5.9	3.4	4.4	3.3	5.4
			mice 5	9.3	4.8	5.1	2.5	4.2
		GDM=HFD	mice 1	10.7	3.9	3.6	2.9	8.6
			mice 2	14.6	7.5	5.2	6.7	6.9
			mice 3	10.9	6.3	4.8	4.8	5.3
			mice 4	10.4	6.3	4.4	2.8	5.4
			mice 5	14.6	6.5	5.6	2.3	4.6
	2A	Plasma TG	PND 21				week 9
							Male				Female
			NGT (MALE)	GDM (MALE)	NGT (FEMALE)	GDM (FEMALE)	NGT-CHOW	NGT-HFD	GDM-CHOW	GDM-HFD	NGT-CHOW	NGT-HFD	GDM-CHOW	GDM-HFD
		experiment 1	1.11058	1.43677	0.714502	1.429	1.25038	1.30474	1.19601	1.44454	1.39017	0.924192	0.753333	0.722268
		experiment 2	1.06399	1.49113	1.25814	1.58433	1.5688	1.39017	1.10282	1.08729	1.28921	1.57656	0.893127	0.621306
		experiment 3	0.722268	1.55326	0.652371	1.5455	1.66199	1.90275	1.65423	0.97079	1.46007	1.04069	0.792165	0.67567
		experiment 4	1.08729	1.28921	1.12612	1.69306	1.55326	1.39017	1.41347	1.22708	1.11835	1.07952	1.38241	0.807698
		experiment 5	0.745567	1.20378	1.00186	1.39017	1.39794	1.39017	1.4756	0.730034	1.26591	0.994089	0.947491	0.691203
		experiment 6		1.17271	1.22708	1.18048	1.35134	1.20378		0.714502	0.698969	0.815464	0.799931	1.11835
		experiment 7		1.25038	1.39794	1.21155	1.28921	0.955258			0.745567	0.730034		0.830997
		experiment 8					1.12612	1.04845			0.931959			0.691203
	2B	Plasma CHO	PND 21				week 9
							Male				Female
			NGT (MALE)	GDM (MALE)	NGT (FEMALE)	GDM (FEMALE)	NGT-CHOW	NGT-HFD	GDM-CHOW	GDM-HFD	NGT-CHOW	NGT-HFD	GDM-CHOW	GDM-HFD
		experiment 1	2.22342	2.56881	1.01457	1.07933	1.35996	3.08689	1.2952	3.34593	1.35996	2.50405	2.30977	2.76309
		experiment 2	1.96438	3.90718	0.25904	5.80681	1.51106	2.4177	1.27361	3.62656	1.31678	2.4177	1.81328	2.46088
		experiment 3	3.64814	2.82785	0.712359	3.30276	1.05775	1.70534	1.42472	2.87102	1.42472	2.4177	1.89962	1.96438
		experiment 4	1.23044	1.68376	1.23044	1.03616	2.30977	2.28818	1.18727	2.07232	1.70534	3.0653	1.23044	2.52564
		experiment 5	1.05775	1.619	0.431733	1.85645	1.66217	3.17324	1.07933	2.24501	2.52564	2.37453	2.37453	2.5904
		experiment 6	2.7415	1.25203	0.841879	3.5618	0.777119	2.84944		2.93578	2.65516	2.71992	1.35996	2.4177
		experiment 7	1.55424	3.32434	1.59741	1.98597	0.992985	2.37453			1.53265	2.52564	1.48948	1.7701
		experiment 8					1.35996	0.820292			1.48948
	2C	Fasting blood glucose	PND 21				week 9
							Male				Female
			NGT (MALE)	GDM (MALE)	NGT (FEMALE)	GDM (FEMALE)	NGT-CHOW	NGT-HFD	GDM-CHOW	GDM-HFD	NGT-CHOW	NGT-HFD	GDM-CHOW	GDM-HFD
		experiment 1	4.7	6.4	9.7	8	7.3	14.2	11	18.4	10.3	8.6	11.3	10.9
		experiment 2	6.1	3.6	8.2	7.9	7.9	13.2	11.7	15.1	8.9	10.4	17	11.4
		experiment 3	6.4		6.2	8.4	10	15.3	14.9	15.2	13.7	12.5	10.6	9.8
		experiment 4	4.9	3.2	10.1	10.6	13.3	13.4	13.9	11	10.1	10.8	13	14
		experiment 5	4.6	3.4	8.7	11.4	16.7	12.5	14	7.9	9	11.8	13.7	13
		experiment 6		2.8	9.6	8.1	9.4	12.3	11	7.6	9.5	7	6.3	10.3
		experiment 7	3.7		9.8		5.2	10.8	7.7	9	8.4	6	6.4	11.4
		experiment 8	5.9	6.2	10.4		3.8	12.6	11.7	9	9.4	10.6	8.2	11.9
		experiment 9	4.7	4.6			5.3	13.1	7.3	9.6	7.2	10.2	9.1	9.6
		experiment 10	3.1				5	13.2	8.5		8.9	8	8.6	10.2
		experiment 11	4.1				7.5	13.9			7.1		7.7	7.9
		experiment 12	5.6				6.5	12.7			9.9
		experiment 13					5.7	10.9
	2D	Plasma insulin	PND 21				week 9
							Male				Female
			NGT (MALE)	GDM (MALE)	NGT (FEMALE)	GDM (FEMALE)	NGT-CHOW	NGT-HFD	GDM-CHOW	GDM-HFD	NGT-CHOW	NGT-HFD	GDM-CHOW	GDM-HFD
		experiment 1	6.86923	15.0696	0.47441	1.19562	259.1	326.83	147.66	332.04	37.98	167.86	211.72	215.7
		experiment 2	12.999	14.6101		6.37734	147.66	211.72	293.5	181.9	93.67	136.81	93.67	215.7
		experiment 3	18.2847	13.9204	4.08375	12.6143	211.72	453.75	131.18	215.7	93.67	203.57	136.81	142.3
		experiment 4	9.03387	9.74234	4.86627		396.16	215.7	125.38	403.5	93.67	203.57	136.81	142.3
		experiment 5	16.6765	18.9751			37.98	190.81	207.68		125.38	63.96	162.98	152.88
		experiment 6	9.74234	16.4469			28.36							79.4
		experiment 7		4.60786
	2E	HOMA-IR	PND 21				week 9
							Male				Female
			NGT (MALE)	GDM (MALE)	NGT (FEMALE)	GDM (FEMALE)	NGT-CHOW	NGT-HFD	GDM-CHOW	GDM-HFD	NGT-CHOW	NGT-HFD	GDM-CHOW	GDM-HFD
		experiment 1	1.40438	4.1525	0.280429	0.419795	1.48084	8.81304	4.09844	5.03832	0.856152	2.6876	2.95246	2.21245
		experiment 2	2.71534	3.0519		2.2675	3.28916	3.66921	3.6646	6.3648	0.429104	2.51447	2.68965	1.41113
		experiment 3		0.880613	2.34135	4.70933	0.338417	3.35962	2.33138	7.78583	1.17721			2.82036
		experiment 4	1.42888	4.41653	2.0979		1.3976	3.05203	1.36837	1.82422	1.4936	3.03709	1.96902
		experiment 5	2.44918	3.03601			0.361605	5.76706	1.3529
		experiment 6	6.37413	4.67824
	2F	Plasma CTRP6	PND 21				week 9
							Male				Female
			NGT (MALE)	GDM (MALE)	NGT (FEMALE)	GDM (FEMALE)	NGT-CHOW	NGT-HFD	GDM-CHOW	GDM-HFD	NGT-CHOW	NGT-HFD	GDM-CHOW	GDM-HFD
		experiment 1	4.67196	1.72364	4.64815			1.95809	1.72211	0.916582	1.59377		2.54278	2.02994
		experiment 2	5.30246	1.45165	4.69594	0.91671	3.65677	1.63397		1.7521	1.47121	1.29773	3.93436	3.28275
		experiment 3	4.35376	2.40033	4.94603		3.06734	2.15796			2.55045	1.58239	2.35601	1.48212
		experiment 4			4.00583	0.77266	4.19488	2.32701	3.78844	0.754576	2.1511	1.49857	2.95507	1.3079
		experiment 5			3.1766	0.93564	4.17265	1.80689	2.48951	0.80161		2.86243	3.17369	1.79463
	4A	mRNA level	BAT
			PND21	NGT (MALE)	GDM (MALE)	NGT (FEMALE)	GDM (FEMALE)
		Ctrp6	experiment 1	0.780701	0.596063	0.0425674	0.239625
			experiment 2	1.09276	0.65155	0.156215	0.114766
			experiment 3	1.12654	0.481823	0.103639	0.302831
		Adiponectin	experiment 1	1.13477	0.0940186	0.949565	0.448501
			experiment 2	1.11901	0.162675	0.707937	0.273015
			experiment 3	0.746215	0.14372	0.470666	0.463951
			experiment 4		0.296042	0.848027
			experiment 5		0.282208
		Adipo R1	experiment 1	1.01184	1.31111	0.430119	1.85956
			experiment 2	0.779785	1.1152	0.795198	1.14014
			experiment 3	0.974675	0.936826	0.7864	1.12801
			experiment 4	1.30591	0.81757		1.50633
			experiment 5	0.927793
	4B	mRNA level	week 9	BAT
				Male				Female
				NGT-CHOW	NGT-HFD	GDM-CHOW	GDM-HFD	NGT-CHOW	NGT-HFD	GDM-CHOW	GDM-HFD
		CTRP6	experiment 1	1.11316	0.563942	0.474372	0.368148	1.15358	0.767487	1.26193	1.05104
			experiment 2	1.15654	0.529313	0.520452	0.460248	0.716509	0.744881	1.21906	0.896278
			experiment 3	0.730296	0.385334	0.179084	0.244045	1.17766	1.1736	1.00446	0.663845
			experiment 4		0.420462		0.552125	0.95226	1.05863		0.411856
			experiment 5						0.899679		0.310123
			experiment 6								0.416073
		Adiponectin	experiment 1	0.882762	1.88404	1.35757	6.36721	0.918929	1.6984	2.15923	5.14048
			experiment 2	0.707898	1.77187	2.17591	6.51631	1.32783	2.2519	1.74175	9.01735
			experiment 3	1.49277	2.66089	1.49846	7.02176	0.806373	1.57989	1.72485	9.08366
			experiment 4		2.1619	1.89477	6.75467		2.30966		3.98309
			experiment 5		1.87128	2.61168					4.23774
			experiment 6			1.78605					6.50849
		Adipo R1	experiment 1	1.11068	0.669043	0.400089	0.525619	0.566616	0.710699	0.708712	0.554656
			experiment 2	0.817844	0.489181	0.530451	0.542119	1.3884	0.392695	0.458974	0.387606
			experiment 3	1.07148	0.497701	0.642944	0.217879	0.67312	0.554257	0.436246	0.345785
			experiment 4		0.478904	0.440667	0.326279	1.37186	0.421372	0.464383	0.2264
			experiment 5		0.375352	0.437829	0.255342		0.51239	0.327818	0.171059
			experiment 6				0.407134		0.350717	0.264283	0.19355
	4C	Protein fold	week 9	BAT
				Male				Female
				NGT-CHOW	NGT-HFD	GDM-CHOW	GDM-HFD	NGT-CHOW	NGT-HFD	GDM-CHOW	GDM-HFD
		CTRP6	experiment 1	0.858895		0.899914	0.831885	1.10897	0.714933	1.06823	0.961484
			experiment 2	1.00349		1.14261	0.945237	0.837675	0.700386	1.03845	0.96692
			experiment 3	1.13762	0.773085	0.699493		1.05336	0.838797		0.873827
			experiment 4	0.991773	0.697751	1.04155	0.704341	1.00949	0.947155	1.03391	1.01573
			experiment 5	1.00018	0.300555			1.00893	0.972208	1.02299	0.954979
			experiment 6	1.00805	0.5888	1.17855	0.881863	0.981581	0.939422	0.997577	1.02165
		Adiponectin	experiment 1	0.965525	0.927282	0.802974	1.00005	0.918929	1.6984	2.15923	5.14048
			experiment 2	1.00399	0.689192	0.654478	0.894539	1.32783	2.2519	1.74175	9.01735
			experiment 3	1.03049	0.679712	0.817816	0.975962	0.806373	1.57989	1.72485	9.08366
			experiment 4	0.922006	0.919211	1.00435	0.918853		2.30966		3.98309
			experiment 5	1.13905	0.874387		1.10816				4.23774
			experiment 6	0.938945	0.979867						6.50849
	5A	mRNA level	sWAT
			PND21	NGT (MALE)	GDM (MALE)	NGT (FEMALE)	GDM (FEMALE)
		CTRP6	experiment 1	0.711655	0.499632	1.06164	1.53693
			experiment 2	1.02856	0.797666	2.00561	2.08442
			experiment 3	1.25978	1.02284	1.24189	2.59029
		Adiponectin	experiment 1	0.677034	0.373882	0.828224	0.872921
			experiment 2	0.951563	0.72803	0.919237	1.09012
			experiment 3	0.988696	0.694514	0.766745	1.30755
			experiment 4	1.38271		1.5917
		Adipo R1	experiment 1	1.00964	1.52316	0.735089	2.31109
			experiment 2	0.79985	1.94991	0.864811	1.21701
			experiment 3	1.13007	1.13352	1.13523	1.22674
			experiment 4	1.06043	0.836049	1.11447
			experiment 5			0.704363
	5B	mRNA level	week 9	sWAT
				Male				Female
				NGT-CHOW	NGT-HFD	GDM-CHOW	GDM-HFD	NGT-CHOW	NGT-HFD	GDM-CHOW	GDM-HFD
		CTRP6	experiment 1	0.78425	0.98928	0.611167	0.557514	0.913989	0.209309	0.464297	1.04092
			experiment 2	0.932603	0.581167	0.827269	0.516343	1.23682	0.051708	0.519954	1.11332
			experiment 3	1.28315	0.78071	0.886797	0.146814	1.01122	0.419797	0.081513	0.461802
			experiment 4			1.07306	0.259662	1.0904		0.378593	0.509253
			experiment 5			1.16561	0.496573	0.747576
			experiment 6				0.68057
		Adiponectin	experiment 1	1.58138	2.99804	11.9075	7.19879	1.16911	7.29772	14.4994	18.1601
			experiment 2	0.887291	2.58034	1.13609	3.34863	0.498219	7.29535	5.51053	2.47545
			experiment 3	0.531327	1.91434	4.11619	7.37319	0.815232	8.28553	7.19302	2.54945
			experiment 4			5.43028	5.78774	1.18838	11.3724	5.51685	4.91627
			experiment 5				5.14796	0.524661	4.53613	7.7229	4.1005
			experiment 6					1.8044	4.11486	6.89615	8.37123
		Adipo R1	experiment 1	1.17728	0.833038	0.471783	0.720013	1.02347	0.769572	0.165316	0.974399
			experiment 2	0.915705	1.77794	0.348718	0.547258	1.13229	0.235982	0.154839	1.7789
			experiment 3	0.907018	2.42159	0.21998	0.304925	0.873839	0.154687	0.346704	1.88379
			experiment 4		1.96252			1.09779	0.789261
			experiment 5					0.872605	0.749422
	5C	Protein fold	week 9	sWAT
				Male				Female
				NGT-CHOW	NGT-HFD	GDM-CHOW	GDM-HFD	NGT-CHOW	NGT-HFD	GDM-CHOW	GDM-HFD
		CTRP6	experiment 1	1.46228	0.387445	0.677626	0.863496	0.986338	1.16309	0.944024	1.02947
			experiment 2	0.581375	0.593873	1.28947	1.01763	1.12106	1.00022	1.06104	1.08703
			experiment 3	0.956342	0.351816	1.39115	0.882225	1.02799	1.05245	1.06232	1.08598
			experiment 4					0.962148	0.815356	0.9382	1.07551
			experiment 5					0.89441	0.932425	1.23795	0.901595
			experiment 6					1.00806	0.8835	1.14871	1.28125
		Adiponectin	experiment 1	0.697097	0.907901	1.07123	1.11719	0.675872	1.7578	1.55414	1.66477
			experiment 2	0.569858	1.13135	0.985113	1.25387	1.24799	1.28081	1.53408	2.15939
			experiment 3	0.805783	0.893675	0.919278	0.995361	1.2309	1.59836	1.57593	1.21229
			experiment 4	1.2389	1.72318	1.31572	1.36607	0.507109	1.23089	1.37122	1.4906
			experiment 5	1.14858	1.03881	1.0603	1.31909	0.95407	1.10288	1.31271	1.78753
			experiment 6	1.53978	1.18804	1.09711	1.19737	1.38405	1.29985	1.41448	1.44294
	6A	mRNA level	week 9	vWAT
				Male				Female
				NGT-CHOW	NGT-HFD	GDM-CHOW	GDM-HFD	NGT-CHOW	NGT-HFD	GDM-CHOW	GDM-HFD
		CTRP6	experiment 1		1.54042	1.15298		0.931411	0.709762	0.545933	0.481248
			experiment 2	1.05398	0.701223			1.06859	0.699952	0.429768	0.507454
			experiment 3		0.680569	1.1138			0.802024	0.334395	0.276036
			experiment 4	1.07598	1.07227	0.917733	0.376297		0.474532	0.539219	0.376362
			experiment 5	0.870044	0.967231	0.817584	0.283347		0.446262	0.294873	0.177991
			experiment 6		0.822002	1.60027	0.38015		0.432228	0.356942	0.197149
		Adiponectin	experiment 1	1.26083	2.44717		1.45195	1.95118	1.74777	3.7075
			experiment 2	1.4888		2.23656		1.21966	1.66118	1.82032	2.58837
			experiment 3			1.66341	2.4449	0.986998	1.53547	2.51464	3.10448
			experiment 4	0.800695	2.989	2.46399	1.41038	0.657691	1.11907	2.76891	3.26217
			experiment 5	0.817305		2.85732	1.64918	0.582546		1.98549	1.68694
			experiment 6	0.632368	1.98166	1.85621		0.601907		2.12602	2.36894
		Adipo R1	experiment 1	1.27497				1.03368	1.2902		0.899711
			experiment 2	0.784477		1.13061	0.433885	0.635376	0.518678	0.957835	0.897691
			experiment 3	1.15346	0.686152	0.89935	0.366755		0.69787	1.69539	1.15207
			experiment 4		0.64991	0.698397	0.423073	1.6025	1.67722	1.45431	0.682648
			experiment 5	0.658032	0.833152	0.712868		0.728446	0.846091	0.999765	1.53276
			experiment 6	1.12906	0.501868	0.756486	0.235457		1.08381	1.73521	0.587052
	6B	Protein fold	week 9	vWAT
				Male				Female
				NGT-CHOW	NGT-HFD	GDM-CHOW	GDM-HFD	NGT-CHOW	NGT-HFD	GDM-CHOW	GDM-HFD
		CTRP6	experiment 1	0.540875	0.233682	0.612926	0.461087	1.20171	1.17215	0.991413	1.06783
			experiment 2	1.10601	0.356684	0.882021	0.578297	1.18099	1.07441	1.04828	0.97204
			experiment 3	1.35311	0.270173	0.871482	0.486632	1.19899	1.12622	1.02782	1.03058
			experiment 4					0.498428	0.770589	1.01469	1.10531
			experiment 5					0.92269	0.822575	1.09698	1.15853
			experiment 6					0.99719	0.905383	1.04695	1.04638
		Adiponectin	experiment 1	0.82469	1.0965	2.02169	1.30263	1.58089	1.82884	1.31212	1.49955
			experiment 2	1.09985	0.786574	1.62259	1.10923	0.949055	1.76602	1.46838	1.93557
			experiment 3	0.958855	1.74209	1.34871	1.27679	1.38865	1.86749	1.42305	1.56497
			experiment 4	1.0668	1.40779	1.27328	1.3913	0.649647	0.71202	1.08386	1.21615
			experiment 5	1.01854	1.25356	0.958594	0.911392	0.66896	0.708706	0.937012	0.973748
			experiment 6	1.03127	1.35796	0.910181	0.889963	0.762804	0.562384	1.00395	1.10213
		Table 1
		PND21
		Male						Female
		CTRP6	Body weight	Body fat ratio	Plasma TG	Plasma CHO	Blood glucose	CTRP6	Body weight	Body fat ratio	Plasma TG	Plasma CHO	Blood glucose
		4.67196	4.9	0.00407143	0.745567	1.05775	8	4.64815	5.2	0.004225	1.22708	0.841879	8.6
		5.30246	6.7	0.0107104	1.49113	2.7415	6	4.69594	5	0.0054148	1.00186	0.431733	7.1
		4.35376	7.2	0.0155417	1.06399	1.96438	6.2	4.94603	6	0.013365	1.12612	1.23044	6.8
		1.72364	13.5	0.0477867	1.49113	3.90718	9.3	4.00583	6	0.0152667	1.25814	0.25904	7.7
		1.45165	9.7	0.0358732	1.55326	2.82785	13.6	3.1766	10	0.022442	0.652371	0.712359	7.7
		2.40033	8.3	0.0333831	1.28921	1.68376	9.6	0.91671	8.3	0.0314048	1.5455	3.30276	8.1
								0.77266	9.7	0.0297753	1.39017	1.85645	9.9
								0.93564	10	0.038589	1.18048	3.5618	8.4
		week 9
		Male						Female
		CTRP6	Body weight	Plasma TG	Plasma CHO	Blood glucose	Insulin	CTRP6	Body weight	Plasma TG	Plasma CHO	Blood glucose	Insulin
		1.7521	24.8	0.377926	11.99	18.4		1.6081	20.8			10.9	18.565
		0.916582	26.5	0.650033	13.53	15.1	7.58	2.02775	20.4	0.544214	7.22333	11.4	14.445
		4.28475	24.6	0.483746	11.8433	15.2	4.72	1.45273	19.7			9.8
		0.754576	24.6	0.317458	12.0633	11		2.0002	20.7	0.544214	6.19667	7.9
		0.80161	22.5		5.17	9	4.72	2.89587	18.5			11.3
		1.72211	24.7	0.438395	11.33	11	7.58	2.74285	18.2	0.710502	7.07667	10.6	22.41
		3.78844	21.2	0.92214	8.54333	11	4.72	2.52075	19			13	12.255
		0.878818	22.3	1.19425	11.11	11.7		3.98102	19.4	0.634916	9.20333	13.7
		2.48951	22.1	0.483746	9.79	7.3		3.76661	19.2			8.6	14.445
		0.858172	22.5	0.619799	10.1567	13.9	5.375	2.74743	21	0.408161	4.95	8.6
		2.32701	23.7	0.891906	12.7233	10.8	3.595	3.46894	21.3			10.4	14.445
		1.95809	26.2	0.423278	11.1833	13.1		2.94311	19.8	0.408161	7.37	11.8	9.975
		1.80689	24	0.302341	10.3767	13.9		2.76115	19.4			6	12.255
		1.63397	26.1	0.861672	9.57	12.7		3.46157	21.5			10.6
		2.15796	23.5	1.70823	9.64333	9.2		3.89676	18.7	1.19425	6.93	13.7
		3.65677	23.7	0.408161	9.57	10		3.61646	17.8			10.1
		3.06734	21.9	0.438395	7.29667	13.3	20.52	2.05999	19.2	0.604682	7.51667	7.2	18.565
		2.41473	21.5	0.483746	12.5033	9.4		4.40006	18.5			8.9	14.445
		4.19488	22.8	0.846555	9.35	7.5	9.975	3.96425	19	0.801204	6.63667	9.9
		4.17265	20.7	1.20936	10.67	5.7
		Male		Female
		CTRP6	Body fat ratio	CTRP6	Body fat ratio
		0.99999	0.0179617	0.36145	0.016594
		1.68931	0.0158073	3.43939	0.0163317
		0.23666	0.0105784	3.67647	0.0117546
		1.86796	0.0150011	2.56499	0.0150231
		1.58621	0.00930858	2.65228	0.0166491
		1.45335	0.0103766	0.97219	0.0166279
		1.20296	0.0195596	2.15253	0.0113488
		0.66134	0.0101195	0.16688	0.0135739
		0.99999	0.0196582	0.87721	0.011243
		0.16688	0.0233149	1.34133	0.0215129
		1.63739	0.0347086	0.85073	0.0329034
		0.14224	0.0212476	1.21803	0.0274946
		0.87721	0.0177576	0.36145	0.0371331
		1.97934	0.0138703	0.23666	0.0163592
		4.39176	0.0128718	0.16688	0.00894639
		1.96056	0.0248783	1.99822	0.0128346
		0.16688	0.0240929	2.31283	0.0130165
		0.40249	0.0322225	1.3571	0.0123975
		1.81346	0.0300642	0.29258	0.0541625
		1.42095	0.0172788	2.07464	0.0298872
		1.63739	0.0260756	1.3571	0.0104047
				1.62024	0.0111612
				1.67192	0.012066
				1.50256	0.0221563
				1.83154	0.0187741
				3.18768	0.0314945
				1.08518	0.0240255
				2.09397	0.0256406
				3.21232	0.0380637

## Sheet: cell area
	PND21								week 9
	sWAT				vWAT				sWAT								vWAT
	Male		Female		Male		Female		Male				Female				Male				Female
	NGT	GDM	NGT	GDM	NGT	GDM	NGT	GDM	NGT-CHOW	NGT-HFD	GDM-CHOW	GDM-HFD	NGT-CHOW	NGT-HFD	GDM-CHOW	GDM-HFD	NGT-CHOW	NGT-HFD	GDM-CHOW	GDM-HFD	NGT-CHOW	NGT-HFD	GDM-CHOW	GDM-HFD
	2873.36	1574.67	2069.18	7124.02	1703.83	2489.04	4850.6	3940.55	1993.94	2379.3	5024.81	2440.23	6473.32	6653.65	7731.99	12132.8	1854.01	5979	11356	11381.6	3021.79	6022.85	7080.08	8094.34
	1789.52	1464.63	1014.06	5041.92	1749.88	2170.91	1420.9	10552.6	1601.17	5856.64	2831.05	2956.64	3078.03	6630.21	2021.17	2044.14	1370.98	5751.97	8013.44	7588.85	1873.34	2659.77	3647.85	3904.88
	2399.13	854.148	683.029	2252.4	2401.66	5007.3	1918.9	1835.01	2143.95	4098.63	3681.25	2796.29	4762.26	2656.81	2461.53	1602.93	889.509	7939.27	7026.83	13359.8	1413.06	4753.52	10000	4169.73
	713.537	606.114	396.541	4001.75	1576.31	5565.65	6793	11816.3	3594.53	1546.88	2333.98	2943.36	4242.31	4732.46	1380.45	4208.2	1723.95	3761.71	4753.04	4140.95	2666.18	2029.88	4174.61	4822.85
	821.834	529.258	635.863	747.598	1788.85	3106.64	2309.6	8367.89	969.922	3547.07	2136.72	1814.84	4215.07	6316.98	2111.19	2380.27	2022.05	5734.71	7845.58	5668.84	1064.87	3895.9	4383.4	5352.54
	1910.04	1186.9	635.863	1086.46	1353.15	2806.36	2380.9	8496.04	2810.35	9287.31	3842.58	5917.38	4022.39	2454.7	7336.94	3934.57	978.46	7505.96	2177.84	3065.54	1209.19	1222.27	2694.73	11136.5
	2257.64	1863.76	450.694	2620.09	527.8	4957.8	826.2	13904.1	1319.34	3133.01	1497.46	5165.43	3370.65	1291.4	4590.3	2563.28	2081.32	8227.32	5833.54	3065.73	3642.01	3207.42	4996.48	3794.34
	1562.44	2251.53	504.848	2433.19	1268.13	4830.38	1546.9	3434.19	3063.09	1906.06	3291.21	3672.85	3003.32	2816.36	3568.97	896.484	1472.23	3390.04	9357.95	4416.5	1685.67	3274.02	5508.79	4593.36
	3304.8	2427.95	394.794	5138.86	644.69	2156.31	1644.5	8897.39	1568.16	2113.09	2650	3399.02	5548.39	1840.73	4975.78	1815.04	1491.95	4629.77	10440.5	8621.5	1672.2	3719.14	4770.12	6911.91
	1271.62	2562.45	394.794	3579.04	1193.75	2088.14	3434.6	8883.15	6609.38	3628.32	1972.27	3217.19	7214.19	6991.49	5404.43	1161.13	1446.26	4230.77	9158.04	6533.16	4007.97	3838.09	8677.93	5170.7
	896.07	2820.96	429.732	1802.62	882.03	1081.8	3529.3	4858.06	3532.03	1266.99	2340.62	2377.93	5111.36	2983.52	7130.92	6885.94	479.417	4549.64	8868.55	11172.7	2542.38	2907.23	4401.17	9996.48
	743.231	1705.68	646.345	5733.62	545.51	6003.9	2048.8	753.76	1553.12	3391.6	1650.59	4484.57	4875.62	3365.88	3497.89	2016.02	634.374	4154.55	4754.89	8545.93	2477.15	6178.71	1826.56	3894.53
	1318.78	3346.72	772.12	1689.08	878.48	6045.28	2994.1	3055.09	1232.62	3143.75	2949.02	3529.88	3628.22	4526.44	8327.02	11882	969.77	5483.03	5944.69	7482.62	4923.45	3251.56	4266.02	6078.52
	1348.47	3096.07	656.826	7125.76	867.86	9667.26	4085	2441.93	2464.65	3126.56	1884.96	2875.78	5094.94	3653.14	4082.57	3635.35	1697.59	2549.72	7966.39	7408.02	3809.37	4250.98	3749.02	9699.81
	1244.54	1493.45	656.826	4538.86	889.11	2311.31	5473.6	7409.45	2819.92	3653.91	3376.17	1278.12	1833.84	5358.54	2550.38	5580.27	1816.12	5249.84	8655.08	5436.26	2044.21	4595.12	3872.27	1952.93
	1188.65	3705.68	656.826	8654.15	2922.37	1631.23	2001	3088.9	3882.81	2453.12	2848.44	3212.11	3418.92	3631.66	3750	6179.1	1859.28	1747.82	4880.01	6507.97	924.855	3988.48	2950.78	2693.16
	1831.44	1941.48	2134.68	5256.77	3025.1	6184.87	4138.7	2585.21	2673.83	2977.93	3025	2080.86	2219.4	2180.52	6464.42	4487.69	1104.12	2487.88	5714.99	8316.67	2005.15	5479.69	7069.92	5382.03
	1116.16	2761.57	503.101	6551.97	931.62	9190.88	3492.2	2684.88	1468.36	5049.41	2872.27	884.961	4309.01	2798.2	2450.4	7453.91	2424.62	1844.8	4952.74	5447.98	664.74	1983.98	3112.5	4641.21
	1856.77	2754.59	1103.15	2062.01	1009.55	2259.37	5864.3	1802.08	453.125	3030.47	3472.27	2083.98	1368.37	4363.38	1739.77	3013.48	1871.19	3173.69	4963.22	6063.9	2359.2	2022.85	3082.62	6017.19
	785.153	855.022	1359.07	3175.55	1937.62	1859.28	3606.4	1709.53	1239.06	3905.86	4655.27	1596.68	2336.16	3338.74	1785.07	7655.47	855.53	3087.81	4523.96	5985	2685.52	4974.22	6058.98	3190.62
	1039.3	2633.19	849.856	3910.92	1133.53	1810.58	3945.3	1929.34	2425	2844.73	2525	2316.6	5580.24	1603.27	3334.24	1842.58	734.553	1661.53	9930.35	8937.08	2293	3231.45	5323.05	6796.29
	637.555	3751.97	1510.18	2115.28	949.33	4056.16	3473.6	8706.06	2735.55	3813.48	2481.84	2529.69	2203.77	3352.6	981.683	4164.84	1495.76	5761.22	15145.5	5771.17	3229.38	4473.63	3131.45	5138.87
	717.031	2225.33	2171.37	2547.6	1346.06	6698.59	3162.1	4680.07	1434.18	3553.12	2086.91	2610.35	2295.91	6087.92	4075.73	5332.03	892.829	4743.38	3957.1	9505.74	1788.98	1140.92	3652.73	4626.17
	3231.44	2592.14	862.084	3066.38	1013.09	2057.3	3359.4	2018.33	934.766	2804.49	2061.33	3255.08	758.492	3774.8	2540.23	2810.55	2760.31	5083.62	13460.7	7033.86	1599.56	4505.08	2898.44	4771.29
	1793.89	3055.02	4005.59	10607	963.5	733.65	2478.5	17497.5	1970.31	3297.85	3898.24	2454.69	1045.11	3739.45	1412.67	2513.48	1294.82	9868.51	10124.9	15577.8	1206.84	4681.84	6565.62	4603.71
	1611.35	2474.24	1551.23	6005.24	839.52	2018.34	1962.9	9515.89	444.141	2330.27	2278.12	2645.9	2549.87	2176.81	1855.57	8263.67	770.095	3024.53	13613.6	4258.9	2304.33	3895.31	2245.9	5172.07
	1257.64	3104.8	1821.99	1993.89	1622.36	1915.27	2790	4212.87	737.109	3201.37	2744.34	4106.25	3427.14	4698.48	5695.59	10535.5	783.569	2618.55	10797.2	5612.99	4104.63	3760.74	3301.56	6554.1
	2399.13	2535.37	1449.91	5063.76	811.18	3046.58	1500	2525.59	1927.15	3680.08	1626.56	5273.24	2161.31	3291.87	12351	5254.1	811.006	3429.28	8337.24	6351.35	1343.54	3669.53	1000.2	6772.66
	1524.89	1475.98	752.031	2758.08	832.43	5391.98	1033.2	3378.13	1816.8	923.438	3821.29	2051.76	3337.21	1446.65	11373.4	2828.71	958.737	3568.38	14313.4	8917.36	2794.29	2975.39	1791.6	3677.15
	1162.44	2553.71	1910.21	3200	1112.27	2688.69	1243.2	9701.88	1862.89	1435.94	2201.56	5011.91	2610.36	5847.91	868.81	14955.1	846.45	1739.19	12237.6	3117.09	2235	5620.31	3930.66	5034.38
	1337.12	1354.59	1022.8	2986.03	1448.79	6246.55	1417	1536	3441.02	811.719	3824.41	1350.98	4240.51	4337.6	7292.02	4584.18	492.111	624.589	6316.36	9321.59	2442.59	2760.35	6374.02	5944.92
	654.148	1410.48	947.681	4098.69	882.03	2179.84	2175.8	5062.74	2259.18	1756.25	2242.19	2277.93	4572.98	3135.45	5273.59	1755.47	1337.78	2492.4	5239.97	6804.02	1727.27	2349.02	5187.31	6090.62
	1880.35	1799.13	513.582	3851.53	347.14	1570.36	2399.4	3595.27	2169.73	3964.65	2360.16	1838.28	1119.61	2467.39	2575.38	9247.46	910.893	3043.23	9167.49	5585.06	2700.16	2238.67	5123.44	7550
	1887.34	759.825	848.982	2903.06	1356.69	3406.1	2335.9	12071.7	3440.82	2997.46	1517.38	3545.51	2567.5	2768.51	2375.8	1683.98	415.951	5695.27	9217.42	5142.95	3222.35	2446.48	4006.84	4978.71
	1521.4	1000.87	1672.63	4136.24	708.45	2140.89	1923.8	6752.69	1675.59	3232.81	3786.72	1655.08	4845.38	3046.59	5228.87	5800.39	1081.57	4763.31	6816.24	4806.48	2500.59	4091.21	6534.57	3876.56
	1082.1	2556.33	2139.05	2526.64	1356.69	2198.51	1432.6	7621.25	2273.83	4008.4	2033.79	1714.06	1736.3	2178.18	1271.09	3348.44	1257.91	4103.8	7663.13	7975.32	1180.09	4137.89	5886.72	2637.3
	529.258	1347.6	829.767	2239.3	407.36	3727.48	589.8	5791.58	832.422	3184.38	1240.62	4465.23	1601.91	2411.15	6002.19	1321.88	1182.53	5157.18	9811.6	10147.4	1644.27	3772.85	2648.24	9559.57
	481.223	2472.49	1332.87	6572.05	807.64	5133.1	1123	4064.25	1504.69	2769.92	1466.8	3095.7	792.541	1758.51	6017.81	4749.41	1922.84	2775.52	2644.44	5618.07	2892.71	4349.02	6694.14	8699.41
	1581.66	1451.53	1085.68	6080.35	673.03	1056.65	1228.5	11279.7	2166.6	4375.59	3030.08	3231.64	1896.13	3221.96	5239.61	6300.59	548.449	3282.18	5497.21	7511.91	3157.51	4422.46	7314.45	4448.44
	1444.54	2046.29	1591.4	2494.32	1062.68	976.3	1138.7	3605.05	1446.09	4340.04	4434.57	1135.35	1448.09	3482.85	3340.69	3949.41	1371.76	2470.21	6265.2	4319.05	4243.48	4422.46	4053.91	6333.2
	1133.62	1048.04	2560.92	3741.49	446.33	1551.7	655.3	9869.18	1872.27	2267.58	1447.46	2090.04	2562.89	3402.4	3456.69	2741.8	418.001	2183.6	6265.2	5650.88	4056.98	2780.66	1506.84	6315.23
	1163.32	521.397	1491.83	3523.14	446.33	1456.74	1067.4	7284.86	1802.73	3184.77	4452.15	2201.76	815.975	4848.66	6351.55	3255.66	726.742	3189.1	11103.9	2894.86	3457.47	3467.58	5013.48	2649.41
	925.764	2379.04	369.465	1917.9	485.29	4811.72	1337.9	7605.23	4040.82	3470.12	2779.1	1910.16	247.556	7781.99	6702.66	11530.3	1777.65	4956.65	12432	8052.06	2837.64	4617.38	3305.27	4564.45
	641.921	1981.66	384.313	3248.03	733.25	5414.71	1903.3	3295.36	1056.84	3229.88	3816.6	2879.69	561.809	5477.66	2050.27	1974.41	873.203	2806.34	4139.96	4708.05	3031.75	2905.66	10525.2	8804.49
	825.328	1518.78	358.11	2296.94	304.64	8281.93	1753.9	2514.91	422.266	2867.58	1823.24	4412.31	1539.72	2940.17	1471.64	2224.61	2200.44	2050.67	5960.72	9886.15	2657.79	1582.23	4591.02	4867.97
	967.686	1678.6	2388.86	2601.75	733.25	3705.57	1953.1	3099.58	435.742	1858.4	2613.67	2043.36	2966.77	2551.55	2597.64	6176.56	738.849	3052.47	5333.66	3247.34	4779.72	3163.09	4503.71	10807.8
	995.633	1848.91	1025.42	3197.38	850.15	4263.92	2340.8	2077.07	660.547	2074.8	2613.67	4095.7	1647.97	2939.19	2186.57	3396.29	2394.55	2237.63	5526.38	10074.6	4660.6	3808.4	3761.52	5941.6
	1055.02	1733.62	777.36	2620.09	680.12	7273.17	1323.2	3346.98	823.828	3109.18	1158.01	1176.17	1104.79	1606.97	2411.54	2403.52	1251.17	3099.32	5797.17	8743.75	2777.69	2317.38	4725.39	10296.3
	826.201	1994.76	506.594	3498.69	1069.77	6636.91	704.1	15505.9	1335.16	1686.13	1045.9	2753.32	959.181	1310.15	1445.67	1263.09	930.323	3291.22	5430.64	6773.16	3781.24	1554.49	1460.16	7106.25
	1795.63	869.869	1321.51	4000	1168.95	2250.45	591.8	4177.27	955.859	4726.95	2888.09	4968.94	478.689	2839.59	2261.95	1925.39	724.594	8380.59	6741.25	6422.82	3126.27	3630.66	6931.25	5803.71
	656.769	1379.91	2109.36	2835.81	970.58	2327.54	683.6	5971.34	1980.08	4726.17	2267.58	5559.38	1278.24	2803.86	2293.98	3428.71	560.752	2343.44	9709.48	5861.58	3769.92	3145.9	4935.35	7772.66
	515.284	2880.35	2465.72	6523.14	680.12	12202.6	493.2	9163.48	3865.82	2632.03	1483.59	908.203	1502.16	5468.48	1654.43	4433.98	874.082	1583.87	9408.49	4911.93	3875.76	3056.64	1892.19	4880.66
	469.869	3350.22	1312.78	4463.76	485.29	5731.21	267.6	9749.93	1884.18	2388.09	2030.08	2973.24	1161.47	2235	3310.62	1905.47	1779.31	4629.15	7829.76	5234.53	2149.27	5539.26	5963.67	7654.69
	558.952	1812.23	1080.44	5824.45	588.02	1604.45	326.2	7975.44	4209.38	5055.08	1849.02	2475	2365.81	4848.66	931.3	2953.91	1518.03	13642.1	5795.94	4572.72	821.747	4724.81	2488.48	5414.45
	772.052	2040.17	1716.31	1062.88	673.03	6556.57	1454.1	7188.75	4497.66	3992.97	1719.34	2583.79	1758.73	2581.04	1026.21	13382.2	2078.58	2183.39	11342.2	3959.15	4135.49	6280.27	4131.44	4787.31
	988.646	1773.8	672.548	4521.4	1062.68	6044.47	1127.9	3591.71	1938.67	2174.8	2629.69	3520.12	2367.61	2607.21	1249.81	8132.23	1959.56	2361.73	9780.16	11875.7	3496.13	3058.79	3705.08	11603.3
	300.437	848.908	1202.72	4518.78	588.02	4736.24	675.8	3097.8	1783.79	1160.55	1796.48	3671.48	1432.46	3926.34	1340.61	6512.5	983.831	1938.49	5656.23	9828.93	3042.3	4285.35	2148.44	7366.6
	1601.75	356.332	527.557	8019.21	485.29	1942.05	759.8	9528.34	2651.17	3210.94	1380.86	9202.54	1129.03	1765.93	2999.34	5254.69	1525.74	1487.1	10668.4	9788.31	1256.84	5536.52	3525.39	4986.72
	1582.53	632.314	2339.07	5200.87	1115.82	9313.42	1997.1	1660.59	756.055	3426.76	4421.29	2462.5	2073.39	2742.93	974.262	2923.63	603.714	9097.84	9963.02	5410.87	1549.37	4446.29	2908.4	2489.84
	591.266	1101.31	3803.83	5540.61	828.89	3687.71	516.6	1716.65	1646.29	2633.98	3560.94	2243.36	2313.33	4259.1	3214.73	8139.45	1239.45	2952.42	8477.15	5528.82	2574.01	2738.48	6670.12	4173.44
	2303.93	2234.06	946.808	7426.2	843.06	2437.92	1559.6	1043.87	2311.72	3418.75	2035.16	5724.81	3185.99	3239.73	2688.64	7163.67	1271.38	2354.33	5934.83	7441.02	1935.05	3464.06	4231.25	4348.83
	1721.4	1295.2	446.327	2716.16	843.06	568.09	902.3	2049.48	3017.77	3808.01	4076.76	4754.3	1689.23	1931.53	1541.36	1546.88	2621.47	6906.02	9909.19	14649.3	2210.01	1495.31	8090.82	2991.21
	1282.97	1136.24	1718.93	5163.32	807.64	3192.66	362.3	1802.08	2157.81	2060.35	1903.91	7119.14	3075.43	3062.41	2401.97	1314.06	2219.09	5425.71	9669.62	13674.4	2034.06	6289.65	4143.16	2777.54
	1940.61	2902.18	529.304	1926.64	2043.89	2125.47	1290	1922.22	4557.42	6577.54	4247.85	6401.56	2170.53	1751.09	1827.06	981.445	1058.82	4683.39	6174.19	7639.04	2740	4006.84	1891.8	10559.4
	1294.32	1198.25	798.323	6171.18	1565.68	3156.14	1943.4	7873.99	2946.68	1499.41	2265.82	4045.12	2516.42	1223.25	2299.25	4242.19	521.012	7291.87	5395.09	3324.48	2387.71	1829.3	3014.65	5621.48
	942.358	1131	905.756	4389.52	2270.6	2434.67	1774.4	4945.27	1749.41	6567.77	4998.24	3182.81	3657.27	4295.03	1231.06	9026.76	560.362	3801.78	5317.43	15817.1	2058.27	2794.34	2577.73	5916.99
	2389.52	2378.17	1066.47	7408.73	3085.32	1665.31	1104.5	10025.8	4877.54	4169.34	5137.89	1491.8	1883.71	4138.02	1773.16	2189.06	1701.1	5947.16	2257.77	10463	4376.85	3174.8	3628.71	4443.56
	2909.17	1455.02	1013.19	2978.17	1987.21	5640.32	2717.8	3916.53	4054.88	3609.96	2534.96	5827.93	3081.24	5138.65	1937.39	4163.48	644.919	3713.63	8198.35	15261.1	3168.84	3208.4	4197.46	4732.62
	464.629	3055.02	672.548	9275.98	7258.12	5469.08	2553.7	3322.06	2856.25	1236.52	2050.39	3784.77	2512.82	4192.51	1008.63	4038.48	1199.32	5669.79	7560.81	3178.21	2923.96	3058.79	6052.54	8549.02
	977.293	4105.68	821.032	4910.04	2709.84	3669.86	2447.3	3331.85	2261.72	6903.71	2616.99	4219.14	2637.6	3090.34	1071.51	4328.12	1886.82	1715.36	16092.4	2728.87	2424.23	3647.07	4519.92	2867.58
	3187.77	2558.95	1127.61	6934.5	1059.14	1462.42	2640.6	4511.88	1778.52	4397.27	2797.27	2757.42	2181.94	3672.08	3565.26	4372.46	518.864	2045.32	16659.1	3956.61	3540.27	5177.54	4597.07	7653.52
	1719.65	1329.26	631.496	6208.73	2008.47	1580.91	1684.6	5687.46	1709.57	2057.03	1277.93	991.602	2592.53	2270.93	3570.14	3875.98	2450.5	5271.82	10979.8	5270.47	3313.15	5170.31	3740.62	8643.16
	1425.33	1950.22	597.432	8261.14	467.58	2237.46	1149.4	3590.82	3367.58	2044.53	1641.02	1614.06	2648.81	1208.01	4490.51	1563.09	1435.42	6960.88	4189.47	3959.34	1755.98	4002.54	2388.87	3589.45
	1002.62	1386.9	1305.79	3878.6	283.38	1300.11	1542	9394.86	3433.79	3145.31	986.328	5340.04	2049.15	650.875	4208.72	10183.2	651.851	3280.12	1786.04	6996.56	5413.41	3860.94	2618.16	7306.84
	1535.37	982.533	2316.36	7850.65	283.38	4035.06	1051.8	4141.67	1604.1	2093.36	2442.19	3262.5	1473.52	1813.78	3771.09	3452.54	1408.67	2869.82	5407.63	7611.31	1605.02	1979.88	2433.79	6860.35
	2743.23	790.393	571.229	4941.48	368.4	7852.62	1299.8	5078.76	891.797	2805.86	3346.09	3108.2	1473.52	2788.04	3753.51	6446.09	829.46	2842.5	4983.15	9841.43	945.36	732.812	1148.83	3282.81
	1281.22	703.93	0	3670.74	680.12	7924.85	835	11901.8	3050.39	3158.2	1949.22	3611.13	1516.98	1854.79	4641.27	5644.92	452.664	3063.57	2497.33	8591.63	3349.09	3110.94	4776.76	2516.6
	937.991	984.279	1100.53	2202.62	432.16	7118.16	1261.7	9639.58	1434.38	2133.4	2242.97	1979.69	2510.01	4128.85	5784.45		1535.99	2786.41	8780.41	6310.54	1219.54	2471.88	5770.9	5227.54
	1358.95	872.489	2409.82	3057.64	864.31	5202.08	1261.7	5466.76	1367.97	1447.27	3079.88	6093.56	3085.64	3393.03	4788.31		625.391	5463.31	5479.95	10352.1	3151.26	2516.02	5223.83	2249.61
	1806.99	919.651	891.781	4587.77	637.61	7113.29	1251	9377.06	1461.91	4025	1924.61	5698.83	2403.06	5907.09	2758.55		880.722	5764.3	4008.88	8629.9	2043.23	2793.75	4518.75	10250
	482.969	2171.18	609.66	1570.31	623.44	10379	1237.3	5056.51	2093.95	1629.69	1982.42	5765.62	3166.16	3036.44	4125.33		231.312	7713.26	4001.68	5493.28	1821.2	4309.96	3303.12	4384.96
	780.786	1742.36	2727.75	3484.72	552.59	1351.24	1714.8	8968.59	2553.71	3680.27	2240.23	4255.47	3223.04	3785.74	5735.04		456.179	3562.42	6838.02	11542.7	1744.45	2128.32	7854.69	8153.12
	1088.21	1295.2	662.067	9076.86	580.93	8526.21	532.2	4906.11	1750.19	1589.65	5623.24	3616.02	1107.6	4530.54	8503.94		1149.33	2038.13	3784.72	9487.39	4457.51	2634.18	4925.19	2585.94
	264.629	1862.01	1202.72	6841.05	733.25	8699.07	556.6	4085.61	1043.94	5773.44	3594.34	1630.47	3098.06	1176.77	12240.7		2368.67	3908.61	3920.94	3818.93	4138.02	1005.66	4509.77	7589.65
	1227.95	1983.41	624.509	4770.31	343.6	8971.76	572.3	1488.83	4420.51	1754.1	3950.2	2756.64	3433.74	2942.51	7190.48		1836.72	1620.44	2921.19	7862.83	2705.44	4906.25	4564.65	8869.34
	286.463	790.393	1780.94	3079.48	283.38	5591.62	1565.4	7435.26	3226.56	2033.79	4610.74	3066.21	2787.41	3687.9	3939.62		2236.27	3632.68	3701.31	2908.14	1747.77	2771.29	745.117	7822.27
	1000	1884.72	1697.09	9004.37	311.72	1140.24	1585.9	6286.38	1950.59	2065.43	4149.02	4569.73	1843.65	1600.73	4948.25		1310.54	1711.46	2169.21	6927.63	1506.4	701.953	4805.27	5228.91
	674.236	1954.59	1176.52	3292.58	283.38	1963.97	983.4	7284.86	815.43	2794.92	3947.27	7075.19	2519.43	4802.38	7563.08		665.228	6268.08	2163.26	4635.8	3425.83	2761.72	8945.7	3168.75
	1127.51	1724.89	493.493	2923.14	1062.68	1435.64	1296.9	7452.17	2796.88	2551.56	4320.31	2931.84	2149.49	4280.97	3793.35		1280.86	3868.14	5899.08	6210.94	3596.12	3386.52	2395.12	11075.6
	570.306	1370.31	1635.08	4481.22	524.26	4621.81	1503.9	6114.62	2608.79	1262.11	1775.39	4358.2	2889.76	5378.26	6572.22		728.109	4052.84	3818.42	4243.48	3290.5	2991.8	2513.48	8218.16
	551.965	1151.09	581.71	11835.8	520.71	1181.63	336.9	2610.13	3470.12	3787.5	2958.98	5110.94	957.979	3186.61	6967.66		797.922	5003.9	6958.21	5799.68	2001.25	4234.96	1458.4	5779.69
	982.533	1917.03	534.545	1324.89	471.12	728.78	1066.4	2053.93	1060.94	2915.23	3078.71	4789.65	2099.22	5970.55	8331.51		1654.33	6790.56	9683.6	3473.28	2724.97	1902.15	3167.38	5419.53
	2292.58	1902.18	648.965		517.17	1835.74	1840.8	2805.02	2807.81	3736.91	3054.69	2672.66	3051.59	540.443	4837.72		1164.76	6716.39	6933.14	4380.96	2745.47	3227.93	5553.71	5382.42
	661.135	1873.36	557.254		485.29	1267.65	1294.9	9763.28	1078.91	4216.99	1795.51	3094.34	1708.66	1113.11	7140.88		454.421	4402.74	2318.38	6488.44	2640.02	3828.52	3593.75	4965.62
	448.035	1116.16	956.415		580.93	1238.44	790	3668.24	2866.21	3011.91	2347.46	2161.13	2068.78	899.078	10705		886.483	3819.65	5375.99		3934.15	4836.13	6831.44	7589.45
	840.175	1556.33	1282.21		708.45	1795.97	1340.8	2029.9	1050.98	4325.78	2930.27	1512.31	1444.68	761.99	5844.98		685.342	9107.29	9918.64		4453.99	2694.14	6816.6	6405.86
	747.598	3150.22	2885.84		481.75	3072.55	886.7	6442.11	1553.91	1816.21	2769.53	3400.78	1793.58	1988.17	3957.78		1278.51	4661	7849.07		1075.81	7582.23	5454.1
	1951.09	1343.23	1892.74		1856.15	1822.76	616.2	9981.31	3421.68	1173.83	2108.79	3180.27	755.888	2480.86	4939.46		906.792	5311.06	12285.3		3368.61	1592.19	3559.38
	832.314	1303.93	921.478		623.44	6032.3	912.1	8521.85	4675	1114.06	4334.57	3149.41	1155.66	5826.82	956.686			11276.1	6162.06		3023.55	3127.54	1988.48
	1247.16	1130.13	484.758		673.03	4164.91	751	7641.72	583.008	1357.81	3062.7	2184.38	2403.36	6944.23	599.125			5624.59	1683.31		3199.3	7307.03	4401.95
	1330.13	2860.26	632.37		768.67	1926.64	834	7877.55	1319.92	4810.94	3961.91	1496.48	2709.9	4385.25	665.521			6905	9383.83		2182.08	4065.62	5668.16
	2057.64	2213.1	2182.72		609.27	1400.75	673.8	4198.63	1657.42	2947.66	3364.45	5644.73	1848.06	3672.08	704.577			4121.26	3160.75		2800.54	4777.34	1005.27
	2273.36	3498.69	3400.3		566.76	1465.67	955.1	4198.63	500.391	2542.38	3558.59		831.598	508.514	687.393			1869.86	4527.86		3526.6	3911.33	2641.41
	1457.64	2595.63	2024.63		797.01	2536.93	1211.9	2442.82	605.469	3552.54	3566.21		1539.42	508.514	1811.83			4849.4	5633.01		3293.63	5227.15	3552.15
	427.074	2823.58	1906.72		807.64	2735.76	569.3	2409.01	3667.97	1830.08	4886.72		1488.54	678.019	2751.91				5565.01		3155.95	4797.46	4265.62
	1471.62	2984.28	1394.01		588.02	9206.3	1773.4	768.89	1925.98	4438.09	2099.8		1616.53	917.239	2427.75				5503.57		2880.8	3757.23	2276.76
	2745.85	4102.18	1585.29		626.98	7277.23	1279.3	792.03	1134.96	2483.2	2056.45		1408.83	944.774	1425.75				18194.9		1418.14	3826.76	4124.02
	1383.41	4602.62	2116.34		758.05	2786.89	1510.7	2271.96	2559.77	2662.5	1642.19		3253.68	383.534	3318.23				2656.56		1198.84	4277.54	3539.65
	2332.75	1582.53	1216.7		673.03	2218.8	679.7	2636.82	4441.21	1782.23	4208.98		2214.99	404.234	2147.71				8893.41		2818.31	3707.42	3769.34
	1146.72	1975.55	1755.61		534.88	1584.97	990.2	2835.28	2397.85	2138.28	5241.99		2101.63		2342.41				8512.9		2468.56	3356.25	1925
	1114.41	2993.01	922.351		566.76	1373.15	1052.7	4055.35	1747.46	1467.97	3380.86		1422.45		6381.81				1077.21		3642.2	3276.17	1223.83
	1106.55	677.729	350.249		481.75	4236.33	1423.8	1929.34	2372.07	1564.45	2631.64		2726.53		4477.43				2791.75		4159.31	4577.15	2521.29
	1558.95	4303.93	309.197		453.41	1576.85	1679.7	2187.42	3943.55	2822.07	1340.04		8285.73		5359.51				4242.69		4560.81	5034.57	4190.04
	1013.97	3049.78	621.015		471.12	701.18	1759.8	2330.69	3403.32	2585.74	1064.26		7941.44		4519.02				6041.46		2967.51	4389.45	1639.26
	1151.96	1547.6	943.314		1034.34	1603.64	1783.2	1029.63	1876.56	2103.52	1190.43		3959.7		6044.95				6226.37		3447.9	3771.09	1628.71
	1659.39	2944.98	2527.73		517.17	1344.75	481.4	1951.59	1009.18	1700.39	2996.09		2690.68		6972.54				4972.06		2167.63	3922.46	3564.45
	1824.45	1151.96	397.415		460.5	822.11	334	3898.73	1665.82	3148.83	2133.4		5700.41		8580.89				8258.34		2487.31	1393.16	3894.73
	914.41	3900.44	478.644		279.84	1557.38	565.4	5705.26	3104.69	2431.25	1834.18		4313.61		10594.8				6661.32		2449.42	3006.84	4577.15
	1202.62	2405.24	478.644		485.29	6726.99	541	2134.91	943.359	2132.03	1807.03		3462.19		8203.99				6274.86		3058.51	4456.84	5478.91
	1658.52	1813.1	779.107		297.55	2025.65	473.6	2071.73	1083.98	2326.56	1897.07		2777.6		11567.7				6317.8		2489.84	4713.28	4418.75
	1652.4	2630.57	700.498		304.64	1151.6	581.1	990.48	4669.92	1892.58	1312.31		4005.77		2881.19				3556.46		2245.55	3567.58	2496.48
	1792.14	2179.04	1961.74		680.12	968.19	912.1	2689.33	2616.02	4824.81	1285.55		2137.08		7186.18				8183.56		3032.93	6595.7	5125.39
	3361.57	2028.82	1258.62		743.88	1232.75	668	1709.53	1496.48	2234.96	3581.64		2614.16		3452.39				5495.36		2180.13	2208.4	4622.85
	1537.99	2055.02	639.357		311.72	1509.5	249	1140.87	5110.74	6102.93	3715.62		2753.76		1130.68						1793.08	4158.98	2192.77
	1155.46	1652.4	1075.2		623.44	1551.7	288.1	1655.25	3226.76	2720.31			1118.01		887.947						3738.87		1710.94
	1756.33	800	1455.15		495.92	1270.09	354.5	2882.44	2616.99	1796.88			1300.47		3071.39						2738.05		3585.94
	865.502	1453.28			517.17	722.29	284.2	4846.49	1864.26	2416.6			891.083		2894.86						1675.52		3422.85
	1074.24	2606.11			580.93	1258.72	460	3068.43	4159.18	1668.75			1515.78		3606.08						2921.42		2693.55
	667.249	2260.26			439.24	1145.92	1104.5	6600.52	964.453	2606.64			3976.93		3947.82						1923.72		2867.19
	1349.35	2206.99			524.26	1068.82	883.8	8572.57	1680.47	3336.13			3092.45		4379.2						4313		3170.9
	1378.17	3761.57			517.17	876.48	433.6	1796.74	2255.27	5016.99			2225.61		604.984						1495.66		2721.88
	1028.82	1767.69			354.23	982.8	523.4	3928.98	1840.43	3239.84			3377.06		500.312						2563.27		3664.84
	885.59	4130.13			481.75	478.01	298.8	7961.2	1411.72	3289.06			2420.09		712.779						953.562		5275.19
	971.179	4735.37			453.41	1541.15	623	11673	8362.5	5110.35			502.724		829.167						1763.2		5826.56
	965.939	2454.15			297.55	1482.71	349.6	2381.42	1965.62	3196.88			3652.26		2541.01						3001.68		3349.8
	509.17	3040.18			368.4	1048.53	842.8	5867.22	1077.15	3284.38			2664.04		1505.23						2727.7		1700.39
	1046.29	4105.68			283.38	1159.71	1005.9	2857.52	3278.71	2497.46			2384.63		1162.51						2415.25		3201.37
	1843.67	2727.51			368.4	2831.52	391.6	6426.09	2376.56	1461.33			2295.11		1162.51						3019.45		3930.08
	710.917	2520.52			361.31	1287.94	1429.7	6693.96	4785.74	1121.88			3167.96		736.994						3132.91		827.539
	1670.74	2467.25			347.14	833.47	1370.1	4322.33	2082.81	3829.88			4236.7		2344.56						3412.75		1167.58
	1346.72	3175.55			170.03	602.99	330.1	5367.98	1343.94	2542.19			822.585		807.686						1495.66		3375.78
	779.039	4122.27			396.73	762.86	1639.6	2334.25	1640.62	3605.86			2015.3								765.505		1969.34
	484.716	2985.15			340.06	1693.72	803.7	2233.69	1211.33	3485.55			2628.78								3059.68		1560.35
	1098.69	3976.42			680.12	3209.71	1364.3	1767.38	1691.21	3985.16			2733.34								4236.64		1826.56
	959.825	2585.15			439.24	1834.12	988.3	937.08	2790.82	2063.67			1874.5								2607.6		3177.54
	1663.76	2990.39			297.55	3083.1	1183.6	1035.86	1245.12	2964.26			4250.12								1148.26		2012.69
	834.061	1736.24			407.36	895.15	1634.8	4120.32	1468.36	1022.85			3686.51								2674.58		1336.13
	1045.41	1915.28			407.36	6187.31	1118.2	501.02	968.555	1823.83			2435.31								1094.16		2669.14
	2196.51	3005.24			485.29	5021.91	1258.8	1931.12	2268.95	3594.34			2401.26								1122.87		5023.24
	2535.37	1967.69			283.38	1070.44	1697.3	2947.41	3480.66	3380.08			2054.96								1451.92		1787.11
	1604.37	3245.41			297.55	1766.76	791	1560.91	1118.75	5159.18			1786.57								1814.37
	695.197	2547.6			279.84	2946.76	1075.2	2475.75	2009.96	1598.44			3090.25								2236.37
	929.258	3080.35			368.4	978.74	744.1	976.24	2245.31	3167.77			2479.37								2477.35
	1659.39	3559.82			1346.06	1617.43	992.2	1776.27	2307.62	3793.36			2703.29								2573.62
	1194.76	2865.5			304.64	1205.97	993.2	1078.58	3080.08	4364.65			2797.03								811.397
	1148.47	2841.92			485.29	5096.58	815.4	3392.36	4157.62	2577.15			1852.07								1775.31
	1510.92	1948.47			255.04	3068.5	1270.5	881.02	1446.88	6937.5			546.187								1968.25
	1175.55	2584.28			407.36	4636.42	1687.5	1238.76	4445.51	2954.1			1318.9								3771.09
	1559.83	2378.17			283.38	3931.18	764.6	7085.52	3030.66	1577.54			3001.32								1524.37
	1003.49	2215.72			439.24	4830.38	849.6	2136.69	3523.44	1657.42			875.26								1653.45
	1195.63	2165.07			247.96	5724.72	645.5	3572.13	5101.56	3676.56			1773.95								1483.36
	513.537	1898.69			247.96	1297.68	679.7	846.31	1633.79	2935.16			2084.8								1643.88
	1289.08	2399.13			311.72	1817.89	501	1842.13	4479.1	2252.15			790.538								1256.64
	731.878	2291.7			407.36		1217.8		5169.14	4312.69			634.914								3598.46
	1591.27	2168.56			765.13		540		5603.71	5082.42			2141.28								3227.43
	1212.23	1663.76			609.27		570.3		6701.56	1622.46			1402.62								2781.79
	1735.37	1659.39			485.29		519.5			1562.89			1469.32								3993.71
	1455.02	1557.2			977.67		744.1			3658.79			985.219								1994.02
	1024.45	2064.63			1402.74		678.7			2170.12			858.236								2572.45
	2452.4	1722.27			1572.77		1026.4			2490.04			1631.75								2338.11
	2027.07	2213.1			2164.33		425.8			4259.18			1224.16								2229.53
	1195.63	2083.84			1586.94		597.7			2721.88			658.949								2201.61
	1009.61	1917.9			878.48		866.2			4346.68			1378.38								1267.97
	558.952	1719.65			1856.15		675.8			1996.88			1966.63								4963.68
	488.21	2274.24			680.12		634.8			2882.42			1900.34								4882.44
	769.432	1855.02			396.73		406.2			2056.84			1440.47								1236.13
	706.55	2033.19			396.73		1863.3			2253.12			1666.4								2240.28
	516.157	1891.7			1289.39		1390.6			3045.31			1402.82								3174.11
	1319.65	1575.55			906.82		692.4			4310.94			2997.72								2131.11
	1435.81	2240.18			743.88		2171.9			5902.73			2352.59								2099.28
	1445.41	2317.9			708.45		1210			2883.79			1782.37								2270.35
	1739.74	2297.82			588.02		1524.4			2718.75			2632.59								3674.82
	1424.45	1668.12			559.68		1368.2			2100.59			991.828								4958.01
	888.21	4590.39			290.47		1966.8			2025			2292.3								2929.23
	724.891	1870.74			396.73		786.1			2076.95			1096.98								2139.7
	785.153	2112.66			534.88		535.2			2603.12			2567.7								2423.25
	751.092	1340.61			340.06		835.9			5609.77			1563.85								1616.15
	234.061	870.742			283.38		895.5			2414.45			3777.04								1583.35
	698.69	1401.75			471.12		463.9			3607.23			859.438								2918.29
	607.86	1946.72			736.79		529.3			2590.82			1840.65								2617.36
	1060.26	2066.38			1154.78		1450.2			2370.31			1396.61								3832.21
	514.41	1748.47			1296.47		646.5			1744.53			948.566								2346.12
		986.026			2975.51		471.7			2993.95			3053.6								2414.08
		1631.44			2837.36		352.5			4303.91			954.575								2628.69
		2000			1732.17		463.9			2824.41			1925.97								2286.75
		1471.62			1207.91		275.4			3041.99			2488.38								1756.37
		1453.28			1204.37		645.5			3069.53			1370.37
		1801.75			432.16		462.9			4433.79			1710.06
		2137.12			446.33		432.6			3221.29			2535.65
		2149.34			311.72		536.1			3003.12			1698.14
		2249.78			170.03		1249						2638
		1801.75			407.36		599.6						1320.5
		1607.86			446.33		994.1						3568.34
		1224.45			793.47		866.2						3995.15
		1433.19			205.45		483.4						2108.64
		918.777			488.83		646.5						3210.02
		1714.41			899.74		733.4						2766.78
		1427.07			407.36		316.4						2460.34
		1317.9			570.31		288.1						2020.51
		1156.33			704.91		315.4						1970.24
		1774.67			297.55		335.9						2012.5
		1323.14			453.41		148.4						1565.45
		1700.44			148.78		152.3						1272.43
		2438.43			247.96		233.4						1349.74
		2721.4			580.93		162.1						2350.59
		2907.42			407.36		297.9						918.923
		3153.71			410.9		293						3073.22
		4531.88			325.89		162.1						1794.98
							624						3120.09
							616.2						945.361
							601.6						1577.67
							162.1						1823.83
							225.6						2505.41
							209						3101.67
							161.1						1399.21
							251						1443.88
							150.4						1135.03
							183.6						2099.02
							226.6						1933.98
							293						1309.89
							550.8						876.863
							483.4						1757.13
							404.3						1128.02
							651.4						2215.19
							534.2						2286.49
							504.9						1860.58
							963.9						2676.86
							443.4						1247
							1241.2						2602.15
							585						1747.42
							920.9						723.041
							657.2						1451.69
							332						1678.02
							359.4						1678.02
							374						2014.5
							231.4						1764.94
							345.7						1764.94
							757.8						4176.51
							955.1						1825.83
							347.7						2682.66
							221.7						3218.84
							946.3						5232.34
							368.2						3428.54
							312.5
							293
							293
							322.3
							228.5
							380.9
							421.9
							267.6
							449.2
							340.8
							673.8
							554.7
							293
							291
							307.6
							472.7
							563.5
							410.2
							333
							261.7
							472.7
							202.1
							259.8
							269.5
							314.5
							455.1
							632.8
							333
							250
							347.7
							303.7
							374
							253.9
							625
							403.3
							904.3
							390.6
							460.9
							203.1
							261.7
							255.9
							234.4
							234.4
							195.3
							241.2
							293
							357.4
							390.6
							355.5
